# Supplementary material for: Nur77 Mediates Anaphylaxis by Regulating miR-21a
Source: MDPI journal article supplement (doi:10.3390/cimb46040199), 2024-04-06
Supplement: s1 [file s1]

**Supplementary Table S1.** The sequences of microRNA mimics

| Name             | Company | Sequence (5'-3')                                             |
|------------------|---------|--------------------------------------------------------------|
| Negative control | Bioneer | AccuTarget™ miRNA Negative Control, mimic #1 (Cat. SMC-2002) |
| miR-21           | Bioneer | UAGCUUAUCAGACUGAUGUUGA                                       |
| miR-124          | Bioneer | CGUGUUCACAGCGGACCUUGAU                                       |

**Supplementary Table S2.** The sequences of SiRNAs

| Name             | Company | Sequence (5'-3')                                                 |
|------------------|---------|------------------------------------------------------------------|
| Negative control | Bioneer | AccuTarget™ Negative Control siRNA (Cat. SN-1002)                |
| SiNR4A1(Rat)     | Bioneer | Sense: GAACCGCAUUGCUAGCUGUtt<br>Antisense: ACAGCUAGCAAUGCGGUUCtg |

**Supplementary Table S3.** Primer sequences for qRT-PCR

| Name             | Sequence (5'-3')                                    |
|------------------|-----------------------------------------------------|
| Fosb<br>(Rat)    | F: GATCCCTTACGAAGAGGGGC<br>R: CGTCTTCCTTAGCGGATGTTG |
| Nab2<br>(Rat)    | F: CAGCGCATGGGCTATGGA<br>R: CCCACACGATCATGGGAGAC    |
| EGR1<br>(Rat)    | F: AACACTTTGTGGCCTGAACC<br>R: GAGGCAGAGGAAGACGATGA  |
| NR4A1<br>(Mouse) | F: GCGTCGGCTTCCTTTAAGTT<br>R: AATCAGAGCCACTGGAGGAC  |
| NR4A1<br>(Rat)   | F: GCCCATTAGACGAGACCCTG<br>R: TGAACCATCCCAAGGGGAGA  |
| NR4A2<br>(Rat)   | F: GTCTGTGGAGACAACGCTTC<br>R: AGGCAGATGTACTTGGCACT  |

---

NR4A3  
(Rat)

F: TCCGCCTTCTACACCGA  
R: GCCTTCATCTGCGGGTC

---

Raw Data

# Immunoblot

Figure 3A

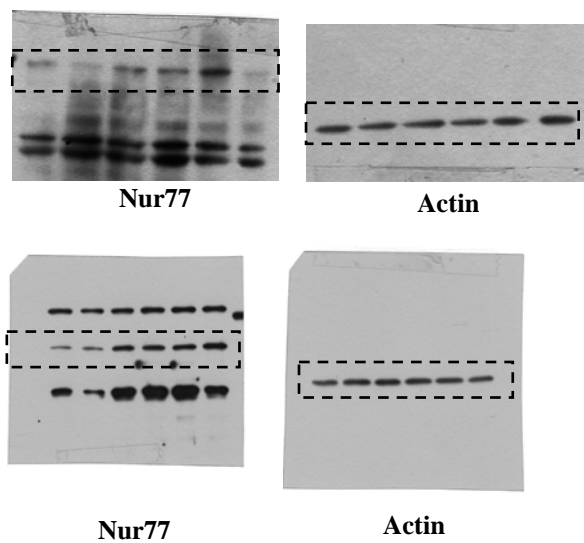

Figure 3C

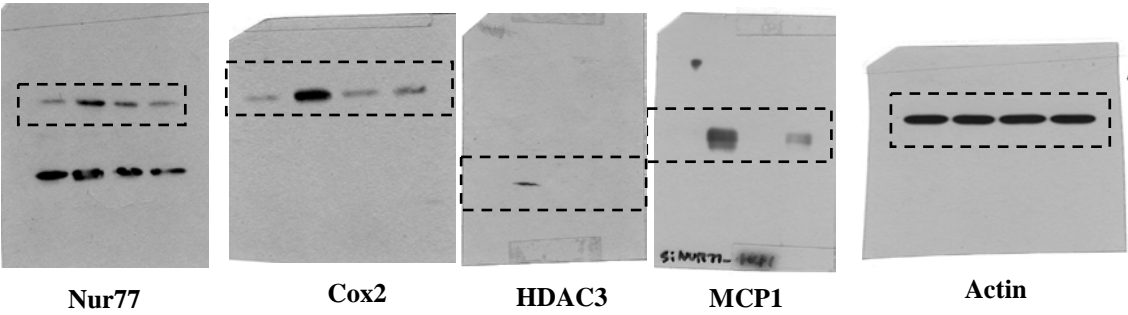

Figure 4C

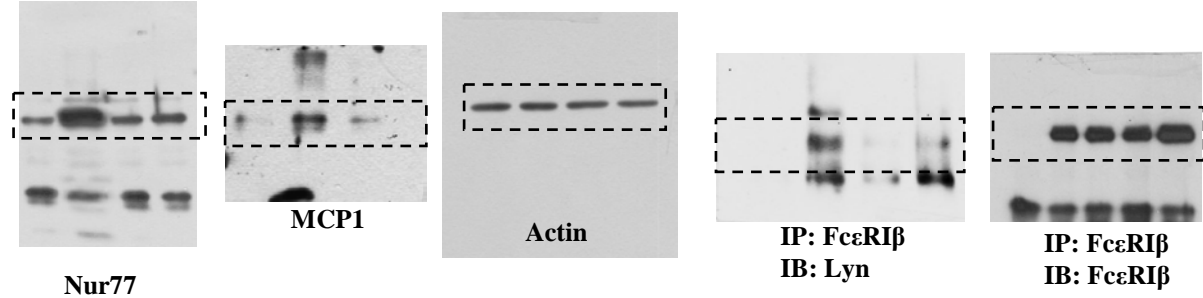

**Figure 5C**

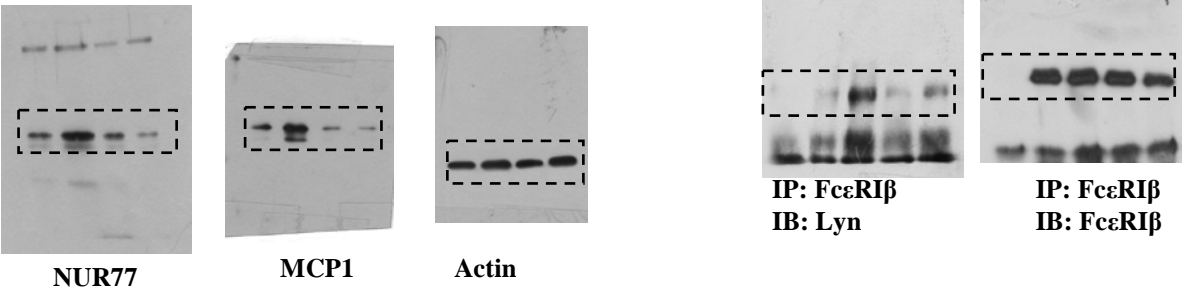

**Figure 7C**

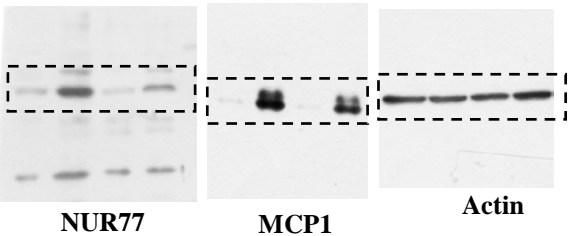

**Figure 7E**

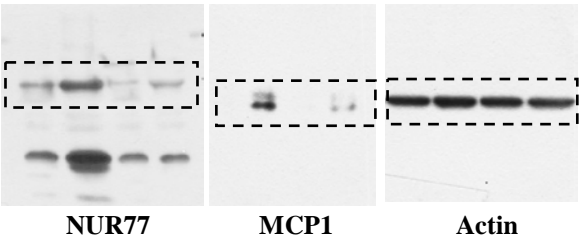

**Figure 8C**

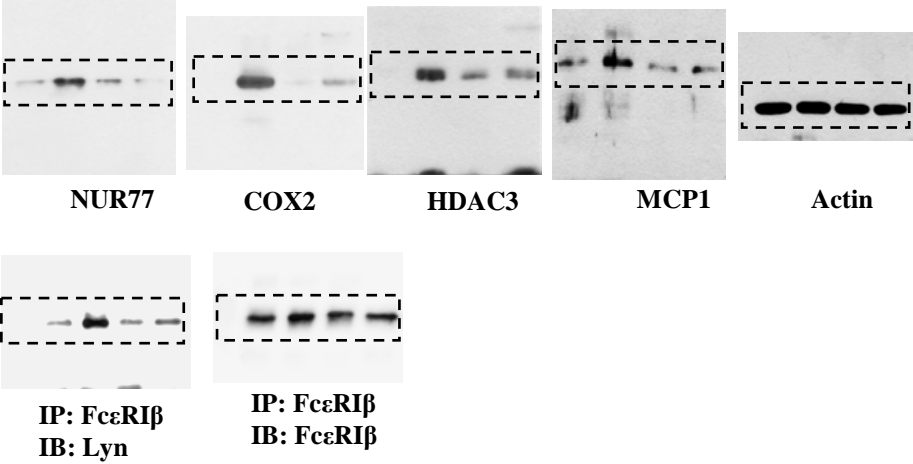

**Figure 9B**

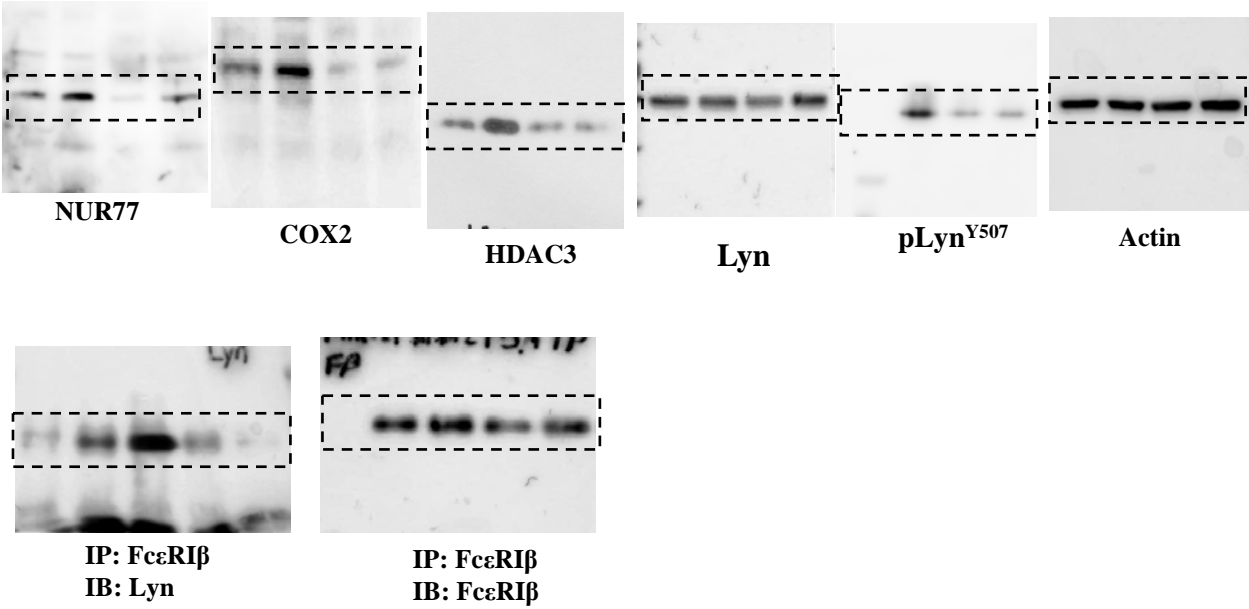

**Figure 10C**

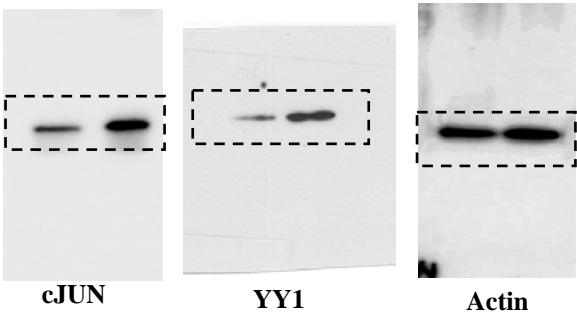

**Figure 10E**

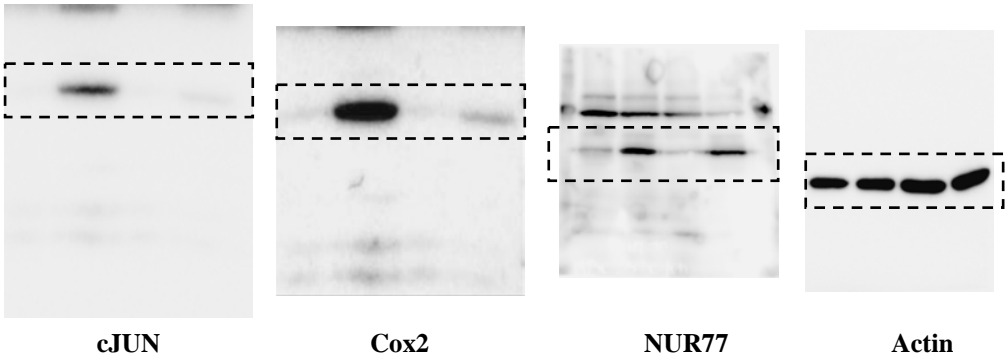

PCA

Figure 4A

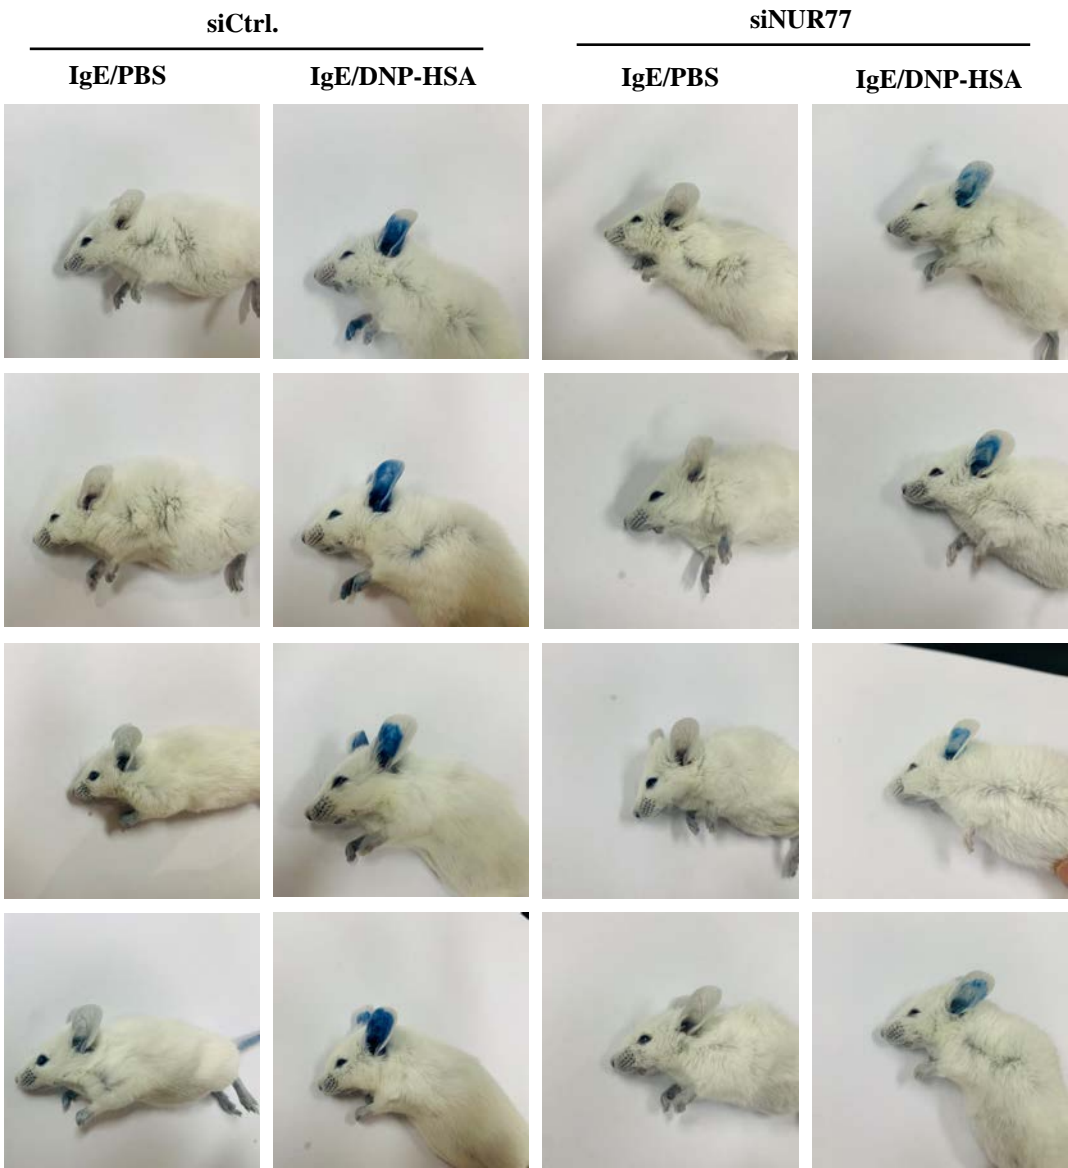

Figure 8A

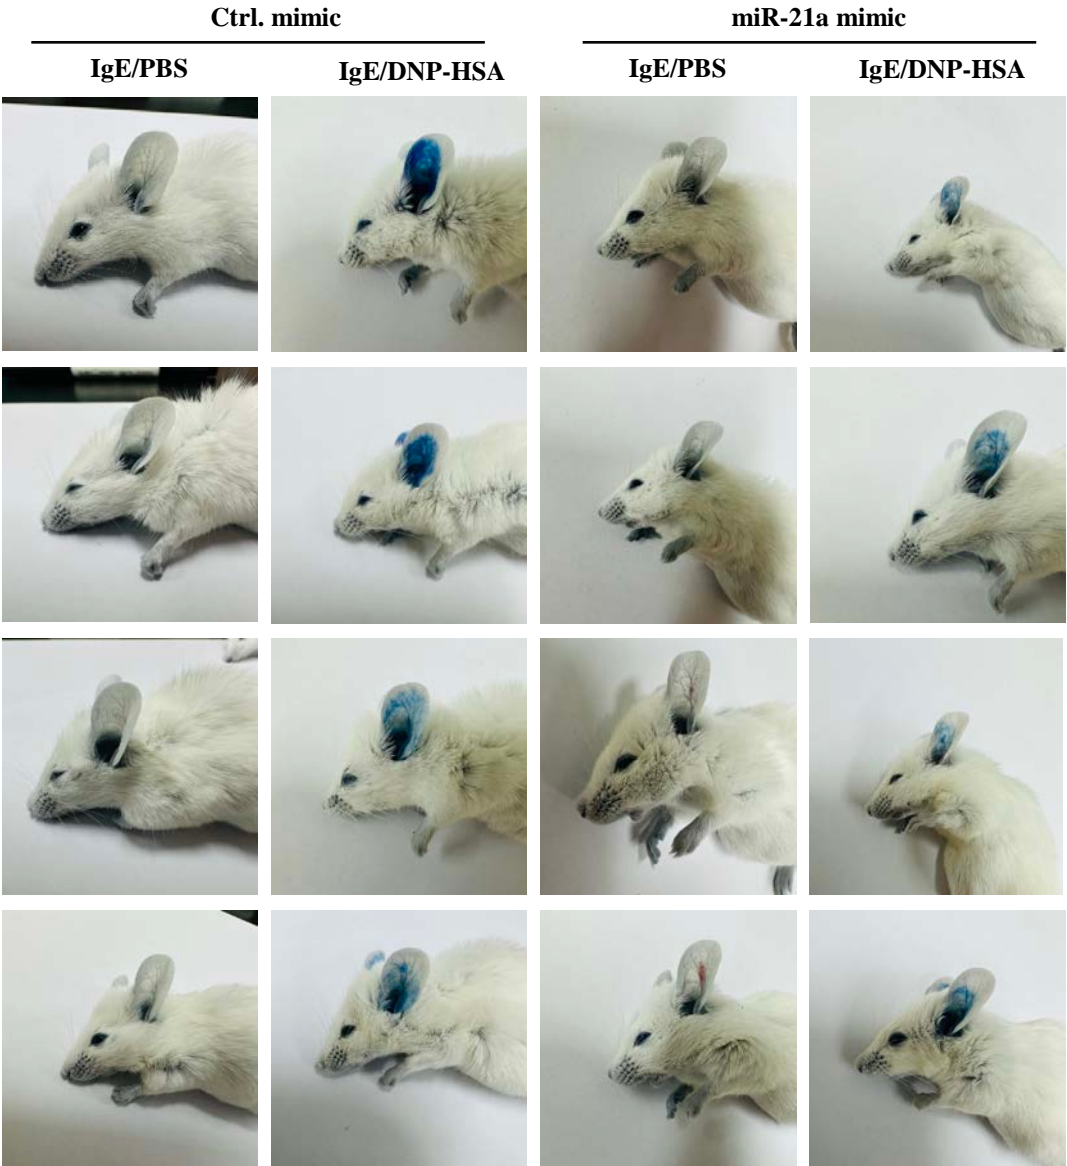



# ChIP assay

Figure 10B

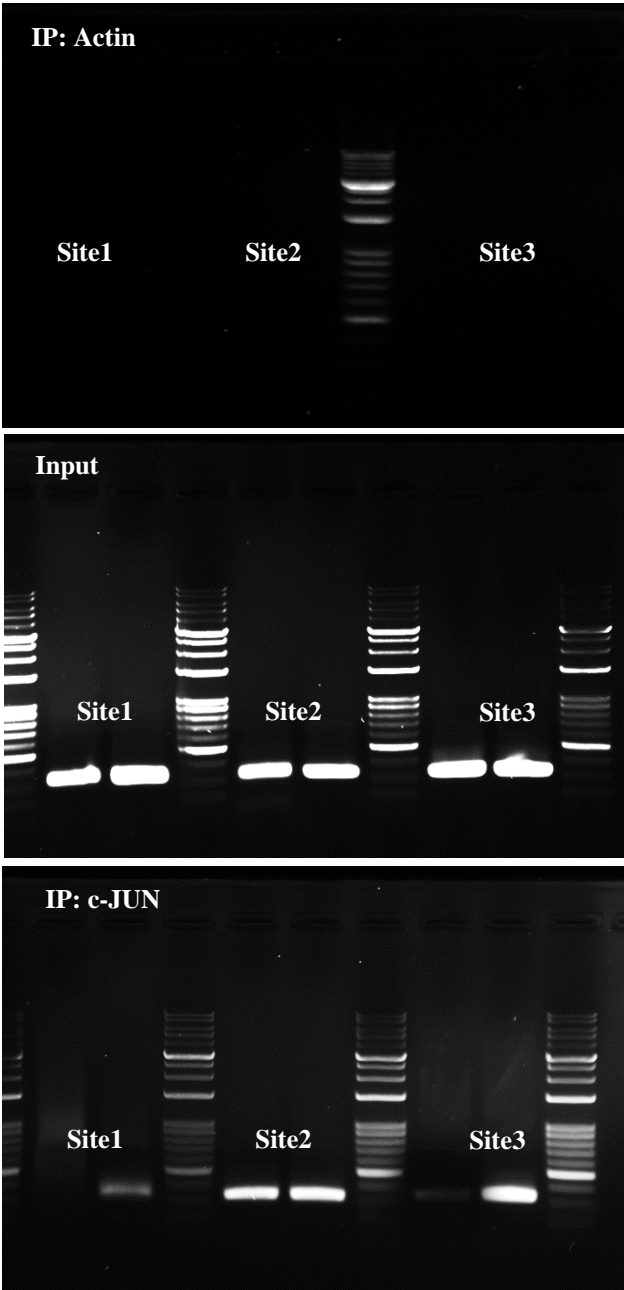

## qRT-PCR

**Fig.2** RBL2H3\_DNP-HSA

| Sample<br>Target gene | IgE/Mock    | IgE/DNP-HSA |
|-----------------------|-------------|-------------|
| <b>NR4A1</b>          | 1.075129448 | 3.20630861  |
|                       | 0.92670716  | 3.292076143 |
|                       | 0.998163392 | 2.63893442  |
| <b>NR4A2</b>          | 1.117192824 | 2.277940325 |
|                       | 0.941038296 | 2.172283304 |
|                       | 0.941768879 | 1.945778237 |
| <b>NR4A3</b>          | 0.790171233 | 2.598021806 |
|                       | 0.813715078 | 2.367708286 |
|                       | 1.396113689 | 2.235275169 |
| <b>EGR1</b>           | 1.030257432 | 1.680124448 |
|                       | 0.99988887  | 2.015121298 |
|                       | 0.969853698 | 1.792234289 |
| <b>FosB</b>           | 0.908850175 | 5.360858928 |
|                       | 1.161762165 | 5.328440134 |
|                       | 0.92938766  | 5.702809235 |
| <b>Nab2</b>           | 0.957300878 | 1.70298678  |
|                       | 1.083863082 | 1.741497172 |
|                       | 0.958836041 | 1.676464633 |

**Fig.3B** RBL2H3\_siNUR77

| Sample<br>Target gene | siCtrl./IgE/PBS | siCtrl./IgE/DNP-HSA | siNUR77/IgE/PBS | siNUR77/IgE/DNP-HSA |
|-----------------------|-----------------|---------------------|-----------------|---------------------|
| <b>NR4A1</b>          | 1.119009475     | 2.710196934         | 0.74844424      | 0.771132782         |
|                       | 1.075008131     | 2.695499725         | 0.595833659     | 0.749304278         |
|                       | 0.805982393     | 2.466342589         | 0.636121523     | 0.780528123         |

**Fig.4B** PCA\_siNUR77

| Sample<br>Target gene | siCtrl./IgE/PBS | siCtrl./IgE/DNP-HSA | siNUR77/IgE/PBS | siNUR77/IgE/DNP-HSA |
|-----------------------|-----------------|---------------------|-----------------|---------------------|
| <b>NR4A1</b>          | 0.99772554      | 2.756831528         | 1.232222832     | 1.138212401         |
|                       | 1.035938907     | 2.776924921         | 1.060647337     | 1.327270884         |
|                       | 0.96750845      | 2.840505512         | 1.125232089     | 1.568419391         |

**Fig.5B** PSA\_siNUR77

| Sample<br>Target gene | siCtrl./IgE/PBS | siCtrl./IgE/DNP-HSA | siNUR77/IgE/PBS | siNUR77/IgE/DNP-HSA |
|-----------------------|-----------------|---------------------|-----------------|---------------------|
| <b>NR4A1</b>          | 0.974211408     | 1.520139774         | 0.703308823     | 0.820576669         |
|                       | 1.025788592     | 1.538370013         | 0.789353623     | 0.819788353         |

**Fig.6B** RBL2H3\_siNUR77

| Sample<br>Target gene | siCtrl./IgE/PBS | siCtrl./IgE/DNP-HSA | siNUR77/IgE/PBS | siNUR77/IgE/DNP-HSA |
|-----------------------|-----------------|---------------------|-----------------|---------------------|
| <b>miR-21a-5p</b>     | 2.619293919     | 1.044515647         | 3.966458517     | 4.227775689         |
|                       | 2.521668933     | 1.010504011         | 3.836346071     | 4.112022982         |
|                       | 2.497217912     | 0.94742973          | 4.016404339     | 3.993294782         |
| <b>miR-124-3p</b>     | 5.437273849     | 0.899251566         | 10.35437936     | 9.68824869          |
|                       | 4.99742568      | 1.013925395         | 9.51198213      | 9.781803038         |
|                       | 5.597372628     | 1.096763015         | 10.64192719     | 10.40757966         |

**Fig.7B** RBL2H3\_miR-21 mimic

| Sample<br>Target gene | Ctrl.mimic/IgE/PBS | Ctrl.mimic/IgE/DNP-HSA | miR-21 mimic/IgE/PBS | miR-21 mimic/IgE/DNP-HSA |
|-----------------------|--------------------|------------------------|----------------------|--------------------------|
| <b>miR-21a-5p</b>     | 1.002687855        | 1.581434608            | 28.39263248          | 18.86530588              |
|                       | 0.978405615        | 1.669026656            | 31.86302401          | 17.45443773              |
|                       | 1.01933118         | 1.745763106            | 28.00029007          | 15.3816203               |
| <b>NR4A1</b>          | 1.061244726        | 1.433928595            | 0.368369502          | 0.357017302              |
|                       | 0.969377637        | 1.337902687            | 0.212084209          | 0.361013446              |
|                       | 0.969377637        | 1.418338316            | 0.426181902          | 0.303129742              |

**Fig.8B** PCA\_miR-21 mimic

| Sample<br>Target gene | Ctrl.mimic/IgE/PBS | Ctrl.mimic/IgE/DNP-HSA | miR-21 mimic/IgE/PBS | miR-21 mimic/IgE/DNP-HSA |
|-----------------------|--------------------|------------------------|----------------------|--------------------------|
| <b>miR-21a-5p</b>     | 0.974461439        | 0.598899961            | 2.025432437          | 1.019030927              |
|                       | 0.984100262        | 0.517539638            | 2.067901841          | 1.041266328              |
|                       | 1.042787927        | 0.587248015            | 2.020457903          | 1.09279455               |

**Fig.9A** PSA\_miR-21 mimic

| Sample<br>Target gene | Ctrl.mimic/IgE/PBS | Ctrl.mimic/IgE/DNP-HSA | miR-21 mimic/IgE/PBS | miR-21 mimic/IgE/DNP-HSA |
|-----------------------|--------------------|------------------------|----------------------|--------------------------|
| <b>miR-21a-5p</b>     | 0.961436004        | 0.508301259            | 0.7294247            | 0.747038153              |
|                       | 0.955216433        | 0.438459666            | 0.791825492          | 0.781958621              |
|                       | 1.088874514        | 0.497623181            | 0.776844121          | 0.785775416              |

## beta-hexosaminidase activity

**Fig.3B** RBL2H3\_siNR4A1

| siCtrl./IgE/PBS | siCtrl./IgE/DNP-HAS | 10nM siNR4A1/IgE/DNP-HSA | 20nM siNR4A1/IgE/DNP-HSA | 40nM siNR4A1/IgE/DNP-HSA | 80nM siNR4A1/IgE/DNP-HSA |
|-----------------|---------------------|--------------------------|--------------------------|--------------------------|--------------------------|
| 100             | 360                 | 222.8571429              | 255.7142857              | 259.2857143              | 277.8571429              |
| 107.1428571     | 330.7142857         | 219.2857143              | 235.7142857              | 260                      | 242.1428571              |
| 100             | 355.7142857         | 254.2857143              | 250                      | 274.2857143              | 280.7142857              |

**Fig.7A** RBL2H3\_miR-21 mimic

| Ctrl.mimic/IgE/PBS | Ctrl.mimic/IgE/DNP-HSA | 0nM miR-21 mimic/IgE/DNP-HS | 20nM miR-21 mimic/IgE/DNP-HSA | 40nM miR-21 mimic/IgE/DNP-HSA |
|--------------------|------------------------|-----------------------------|-------------------------------|-------------------------------|
| 82.94930876        | 268.8940092            | 136.8663594                 | 141.7050691                   | 143.7788018                   |
| 117.5115207        | 281.3364055            | 133.4101382                 | 127.1889401                   | 183.1797235                   |
| 99.53917051        | 243.3179724            | 125.8064516                 | 180.4147465                   | 167.9723502                   |

**Fig.7D** RBL2H3\_miR-124-1 mimic

| Ctrl.mimic/IgE/PBS | Ctrl.mimic/IgE/DNP-HSA | 0nM miR-124-1mimic/IgE/DNP-HS | 20nM miR-124-1mimic/IgE/DNP-HS | 40nM miR-124-1mimic/IgE/DNP-HSA | 80nM miR-124-1mimic/IgE/DNP-HSA |
|--------------------|------------------------|-------------------------------|--------------------------------|---------------------------------|---------------------------------|
| 97.6744186         | 205.1162791            | 106.0465116                   | 126.9767442                    | 113.7209302                     | 131.8604651                     |
| 104.6511628        | 246.2790698            | 117.2093023                   | 132.5581395                    | 114.4186047                     | 96.97674419                     |
| 97.6744186         | 207.9069767            | 98.37209302                   | 106.744186                     | 121.3953488                     | 134.6511628                     |

**Fig.10D** RBL2H3\_siCJUN

| siCtrl./IgE/PBS | siCtrl./IgE/DNP-HAS | 10nM siCJUN/IgE/DNP-HAS | 20nM siCJUN/IgE/DNP-HSA | 40nM siCJUN/IgE/DNP-HSA | 80nM siCJUN/IgE/DNP-HSA |
|-----------------|---------------------|-------------------------|-------------------------|-------------------------|-------------------------|
| 101.1363636     | 251.1363636         | 184.0909091             | 153.4090909             | 186.3636364             | 196.5909091             |
| 100             | 242.0454545         | 209.0909091             | 167.0454545             | 172.7272727             | 203.4090909             |
| 109.0909091     | 251.1363636         | 220.4545455             | 200                     | 205.6818182             | 232.9545455             |

## Evansblue absorbance

**Fig.4A** PCA\_siNUR77

| siCtrl./IgE/PBS | siCtrl./IgE/DNP-HSA | siNUR77/IgE/PBS | siNUR77/IgE/DNP-HSA |
|-----------------|---------------------|-----------------|---------------------|
| 1.14614         | 31.14798            | 2.821           | 27.98031            |
| 1.51024         | 46.00326            | 2.0928          | 8.53737             |
| 4.13176         | 53.57654            | 3.14869         | 12.54247            |
| 8.53737         | 45.23865            | 4.05894         | 7.37225             |

**Fig.8** PCA\_miR-21 mimic

| Ctrl.mimic/IgE/PBS | Ctrl.mimic/IgE/DNP-HSA | miR-21 mimic/IgE/PBS | miR-21 mimic/IgE/DNP-HSA |
|--------------------|------------------------|----------------------|--------------------------|
| 0.097612           | 1.15600625             | 0.1437495            | 0.175123                 |
| 0.11883525         | 1.241822               | 0.086539             | 0.234179                 |
| 0.10960775         | 1.12094175             | 0.0662385            | 0.2064965                |
| 0.10591675         | 1.11725075             | 0.252634             | 0.1400585                |

# Serum Histamine ELISA

Fig.5 PSA\_siNUR77

| siCtrl./IgE/PBS | siCtrl./IgE/DNP-HSA | siNUR77/IgE/PBS | siNUR77/IgE/DNP-HSA |
|-----------------|---------------------|-----------------|---------------------|
| 8.900713799     | 19.39855292         | 7.648027457     | 9.64639862          |
| 9.047765805     | 15.73530441         | 7.221996246     | 6.722037437         |

Fig.9 PSA\_miR-21 mimic

| Ctrl.mimic/IgE/PBS | Ctrl.mimic/IgE/DNP-HSA | miR-21 mimic/IgE/PBS | miR-21 mimic/IgE/DNP-HSA |
|--------------------|------------------------|----------------------|--------------------------|
| 15.25695213        | 37.11002668            | 14.35351073          | 27.13684996              |
| 15.45111559        | 40.90434139            | 15.45111559          | 28.40333769              |
